# Supplementary material for: Phospho-Ser784-VCP Drives Resistance of Pancreatic Ductal Adenocarcinoma to Genotoxic Chemotherapies and Predicts the Chemo-Sensitizing Effect of VCP Inhibitor
Source: MDPI journal article supplement (doi:10.3390/cancers13205076), 2021-10-11
Supplement: s1 [file s1]

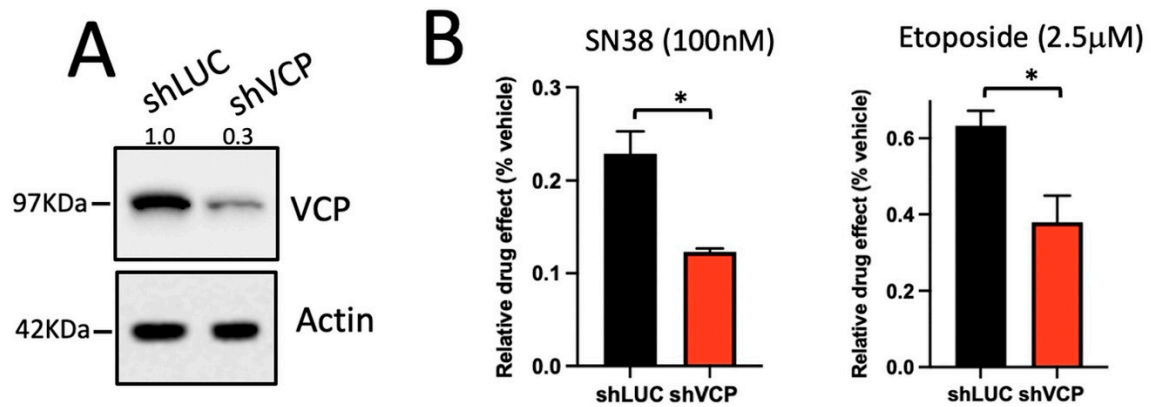

**Figure S1.** VCP knockdown sensitizes PANC-1 cells to genotoxic chemotherapies, related to Figure 4. **(A)** Western blot showing VCP knockdown (combined shVCP #1 and #2), controlled by shLUC, in PANC-1 cells. 70% of total VCP was knocked down based on densitometry analysis. The uncropped Western blot figure was presented in Figure S3. **(B)** Clonogenic assays using shLUC or shVCP-infected PANC-1 cells treated with SN38 or Etoposide. Data are mean  $\pm$  SEM. P values are based unpaired t-test.

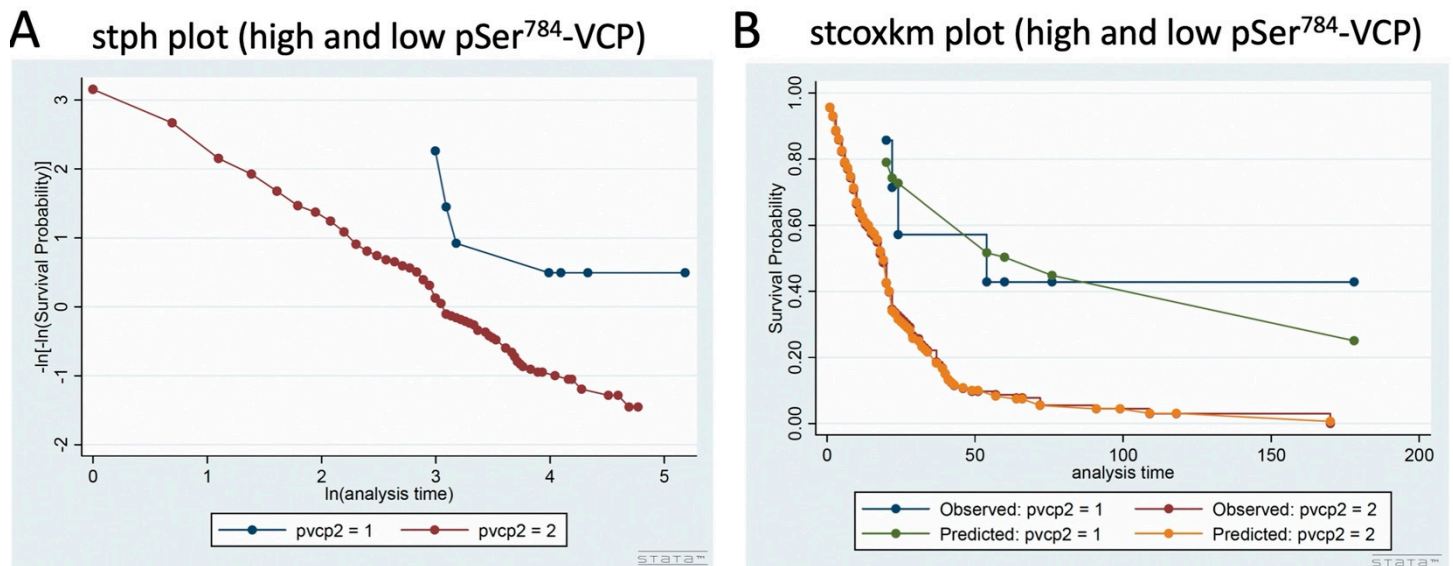

**Figure S2.** Visual assessment of proportional hazard assumption for pSer<sup>784</sup>-VCP, related to Figure 5. **(A)** The proportionality assumption was assessed visually using the  $-\ln(-\ln(\text{survival}))$  plot. The subgroup curves of pSer<sup>784</sup>-VCP do not cross, suggesting that the proportional hazards assumption is met. **(B)** The proportional hazards assumption was assessed for pSer<sup>784</sup>-VCP by comparing visually observed versus predicted survival curves. The observed and predicted survival curves accompany each other, suggesting that proportional hazards assumption is not violated.

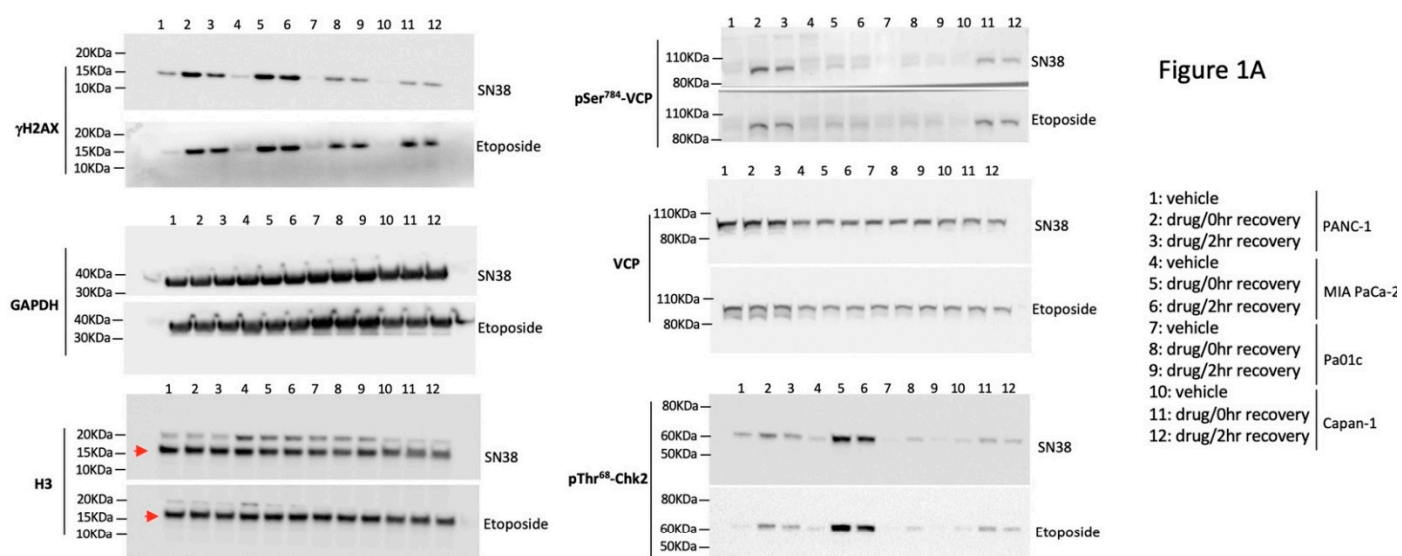

Figure 1A

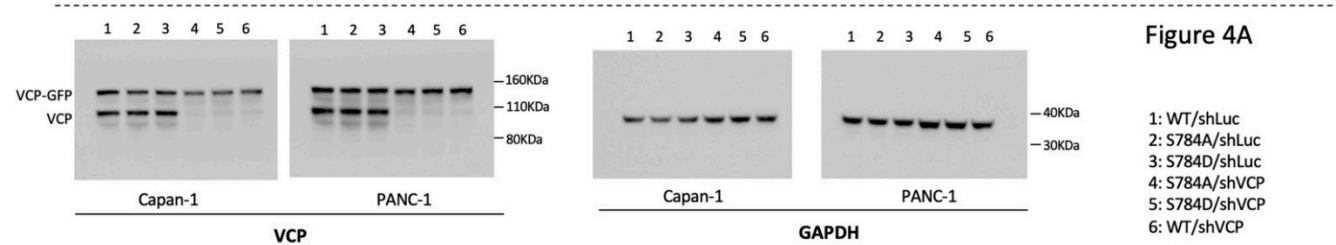

Figure 4A

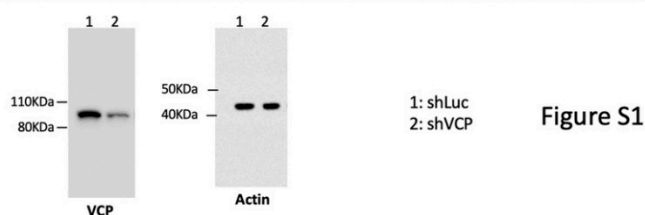

Figure S1

Figure S3. Raw Western blot data.

**Table S1.** Proportional hazard assumption analysis for pSer<sup>784</sup>-VCP, related to Figure 5. 1. In this cox-regression model, the proportional hazards assumption was performed with the estat phtest command in Stata 12.0 and was not violated in any model ( $P>0.05$ , test carried out with the detail option in Stata 12.0 to examine the proportional hazards assumption for each predictor as well as to carry out the global test).

```
estat phtest, detail
```

```
Test of proportional-hazards assumption
```

```
Time: Time
```

|              | rho      | chi2 | df | Prob>chi2 |
|--------------|----------|------|----|-----------|
| pvc2         | 0.06987  | 0.56 | 1  | 0.4531    |
| vcp          | 0.03188  | 0.11 | 1  | 0.7441    |
| gender       | -0.00842 | 0.01 | 1  | 0.9248    |
| race         | 0.06178  | 0.45 | 1  | 0.5047    |
| tobacco      | -0.01424 | 0.02 | 1  | 0.8863    |
| lymphatici~n | 0.01893  | 0.05 | 1  | 0.8272    |
| stage        | 0.04645  | 0.34 | 1  | 0.5599    |
| venousinva~n | -0.02061 | 0.06 | 1  | 0.8125    |
| perineural~n | 0.02011  | 0.05 | 1  | 0.8278    |
| global test  |          | 2.07 | 9  | 0.9903    |
